# Supplementary material for: Generation of dual anion vacancies on CeO2/Co4N interfaces to facilitate hydrogen evolution reaction in alkaline solution
Source: Royal Society of Chemistry journal article supplement (doi:10.1039/d3nj02218h), 2023-01-01
Supplement: d3nj02218h1.pdf [file d3nj02218h1.pdf]

## Supplementary Information

### **Generation of Dual Anion Vacancies on CeO<sub>2</sub>/Co<sub>4</sub>N interfaces to Facilitate Hydrogen Evolution Reaction in Alkaline Solution**

Min Zhou <sup>a</sup>, Tingyan Zou <sup>a</sup>, Zixun Wang <sup>a</sup>, YiFeng Zeng <sup>a</sup>, Muhammad Afsar Khan <sup>a</sup>,  
Yuxue Zhou <sup>a\*</sup>, Fei Lu <sup>a\*</sup>, Xianghua Zeng <sup>a</sup>

<sup>a</sup> College of Physical Science and Technology, Yangzhou University, Yangzhou  
225000, China.

\*Corresponding authors: yxzhou@yzu.edu.cn (Y. Zhou), feilu@yzu.edu.cn (F. Lu).

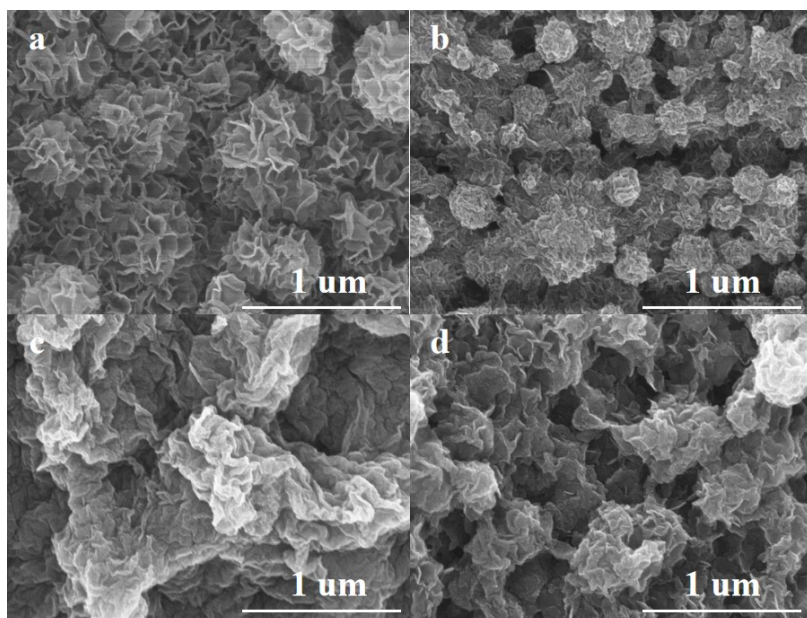

**Figure S1. Figure S1.** SEM images of various CeO<sub>2</sub>/Co(OH)<sub>2</sub> precursors. (a) current density of 20 mA/ cm<sup>2</sup> and deposition for 5 min, (b) current density of 20 mA/ cm<sup>2</sup> and deposition for 10 min, (c) current density of 30 mA/ cm<sup>2</sup> and deposition for 5 min and (d) current density of 30 mA/ cm<sup>2</sup> and deposition for 10 min.

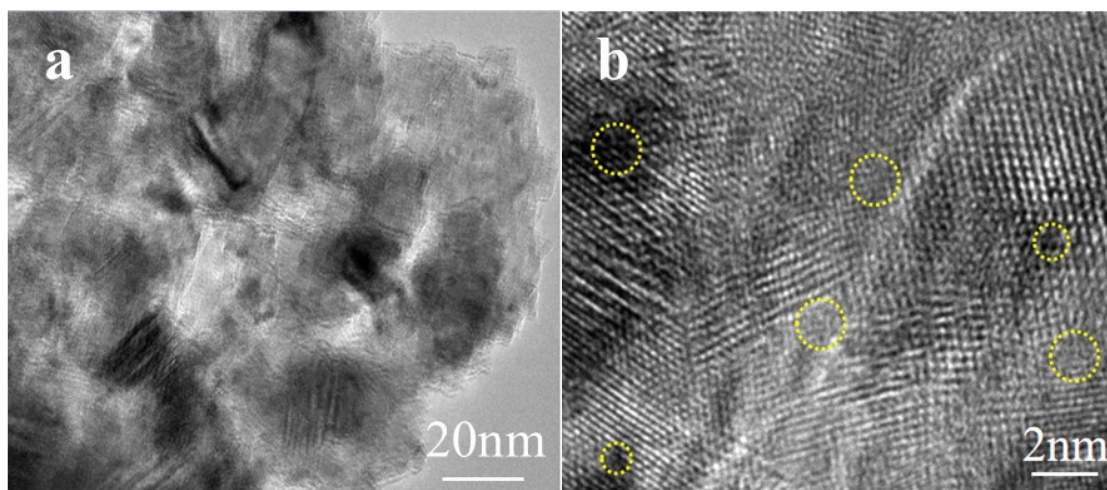

**Figure S2.** (a) TEM and (b) High-resolution TEM image of CeO<sub>2</sub>/Co<sub>4</sub>N.

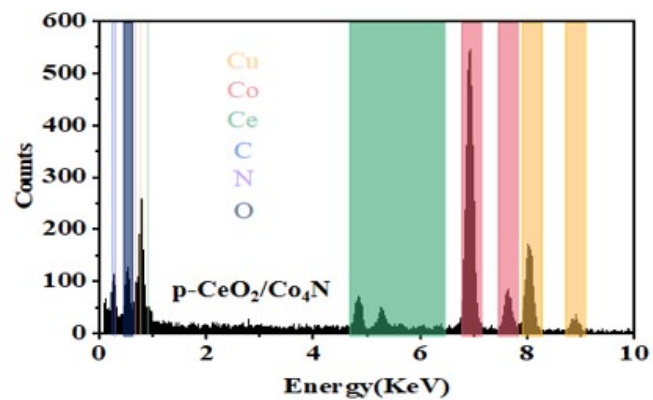

**Figure S3.** Energy dispersive spectroscopy (EDS) result of p-CeO<sub>2</sub>/Co<sub>4</sub>N.

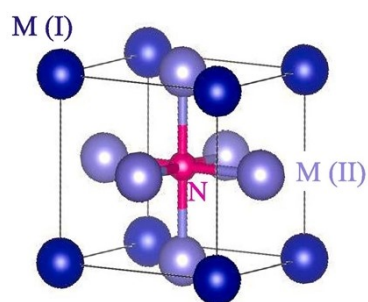

**Figure S4.** Schematic diagram of Co<sub>4</sub>N anti perovskite type fcc structure.

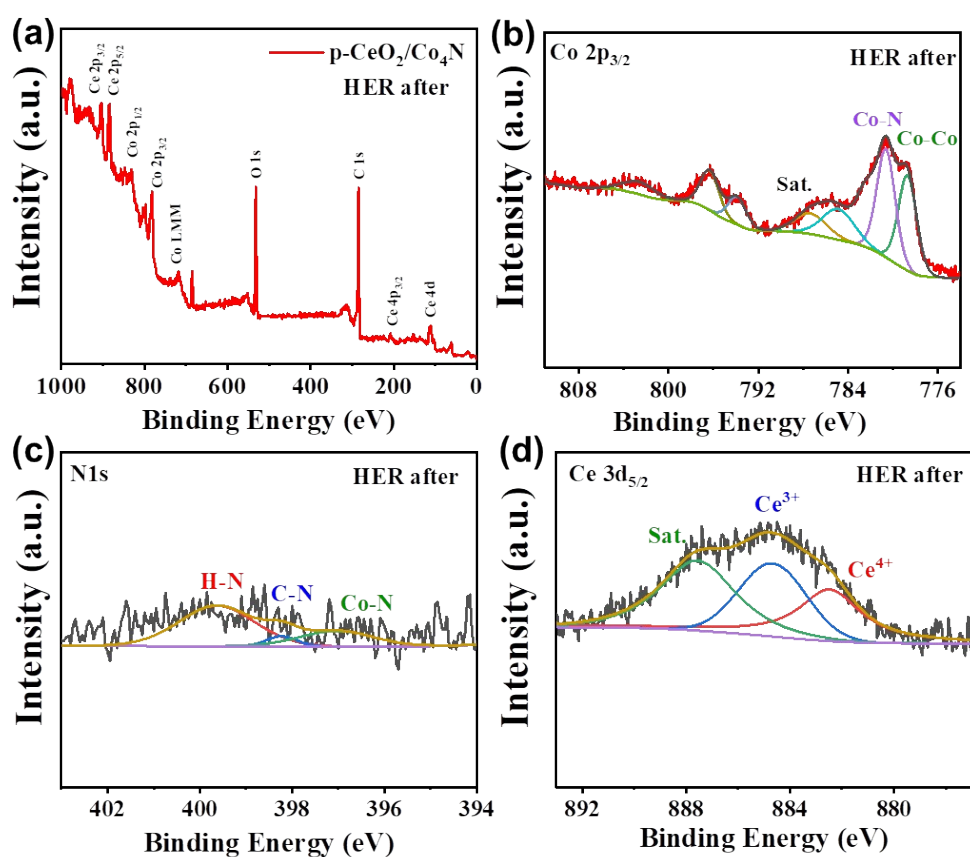

**Figure S5.** XPS spectra of p-Co<sub>4</sub>N-CeO<sub>2</sub> after HER catalysis test.

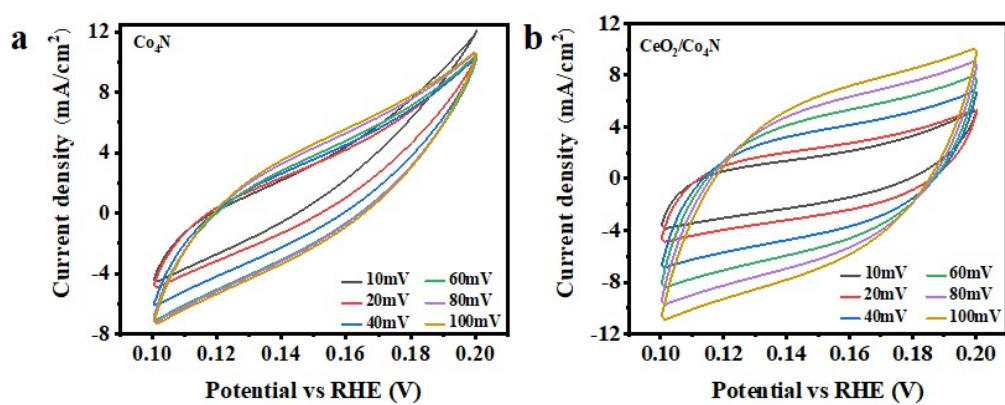

**Figure S6.** CV curves of (a) Co<sub>4</sub>N and (b) CeO<sub>2</sub>/Co<sub>4</sub>N in the 0.1-0.2 V non-Faraday voltage interval.

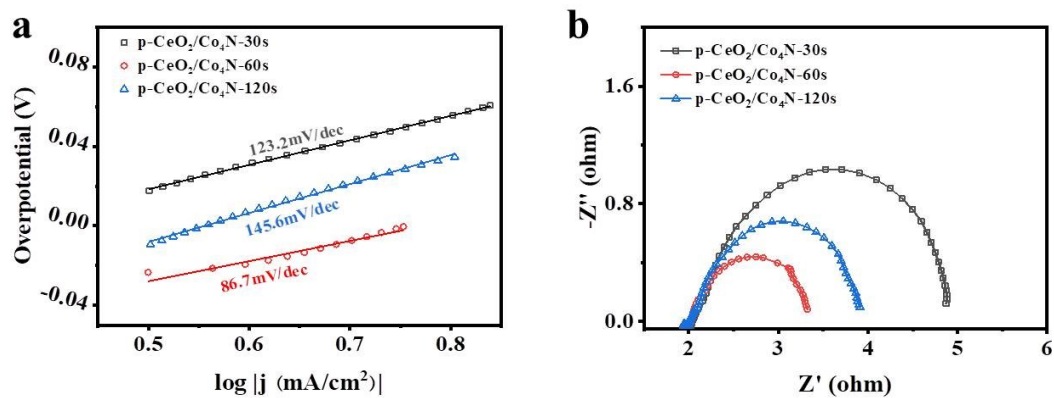

**Figure S7.** (a) The corresponding Tafel slope plots and (b) Electrochemical impedance spectroscopy of the p-CeO<sub>2</sub>/Co<sub>4</sub>N samples under plasma treatment for 30s, 60s and 120s.
